# Supplementary material for: Development of quaternary ammonium based acrylic copolymer antimicrobial coatings for polyurethane tracheoesophageal voice prostheses
Source: Royal Society of Chemistry journal article supplement (doi:10.1039/d4tb01071j), 2024-01-01
Supplement: d4tb01071j1.pdf [file d4tb01071j1.pdf]

## Development of quaternary ammonium based acrylic copolymer antimicrobial coatings for polyurethane tracheoesophageal voice prostheses

Manjeet Singh<sup>1</sup>, Aiman Afreen<sup>1</sup>, Mohd Anees<sup>1</sup>, Dinesh Kalyanasundaram<sup>1</sup>, Harpal Singh<sup>1\*</sup>, Naresh Bhatnagar<sup>2</sup>

<sup>1</sup> Centre for Biomedical Engineering, Indian Institute of Technology Delhi, New Delhi-110016, India

<sup>2</sup> Department of Mechanical Engineering, Indian Institute of Technology Delhi, New Delhi-110016, India

### Supplementary information

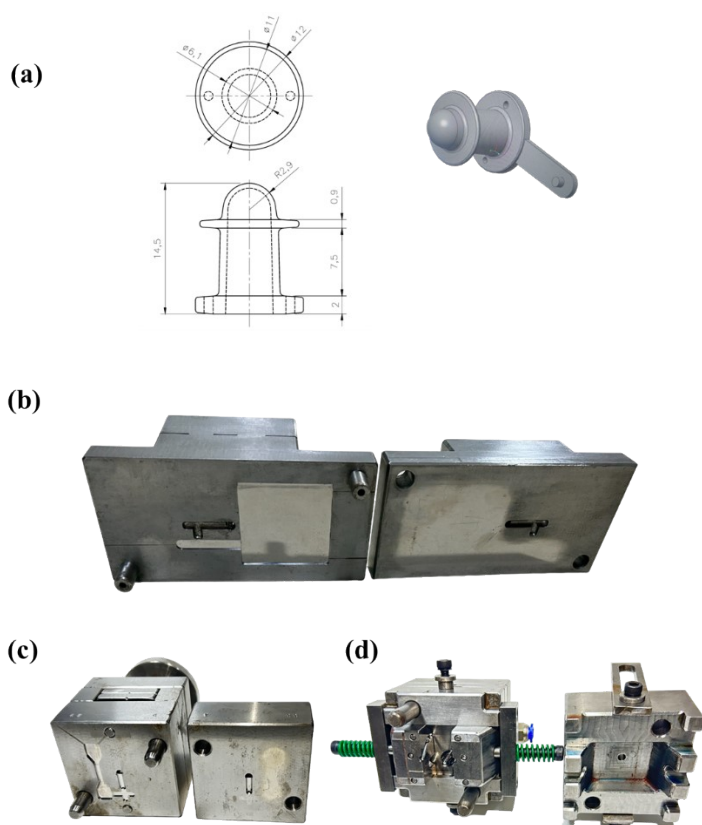

**Fig. S1:** (a) Drawing of the generic design indwelling tracheoesophageal voice prosthesis (TEP), (b) Injection molding tool for test sample sheet, (c) Injection molding tool for dog bone specimen, (d) Injection molding tool for tracheoesophageal voice prosthesis (TEP)

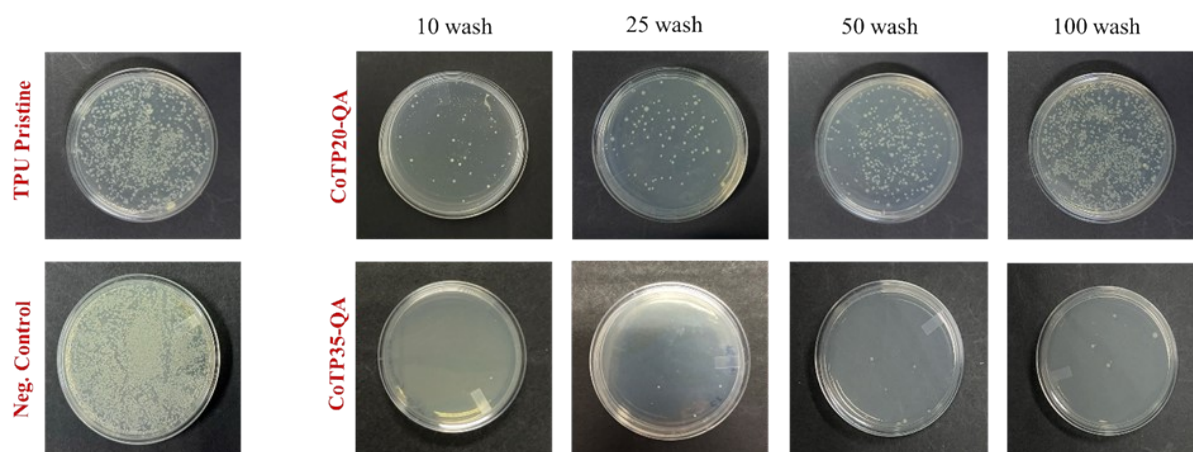

**Fig. S2:** Antimicrobial efficacy study of CoTP20-QA and CoTP35-QA after washing with PBS (pH 7.4) against *E. coli*.

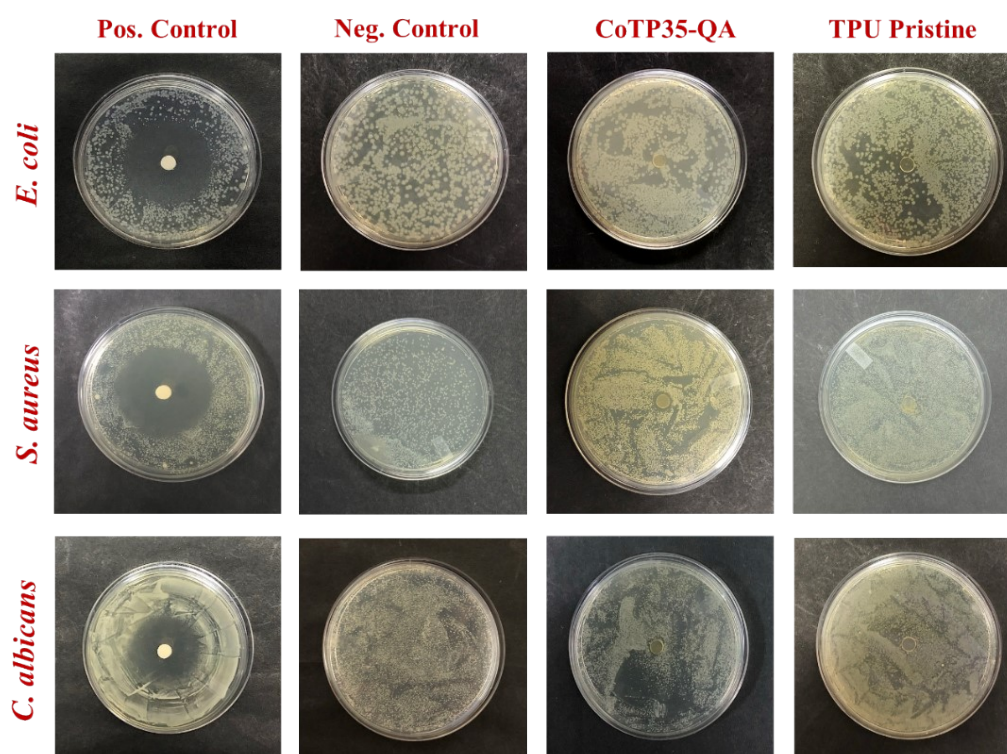

**Fig. S3:** Agar diffusion antimicrobial study of TPU Pristine and tetracopolymer coated quaternized TPU against *E. coli*, *S. aureus* and *C. albicans*.

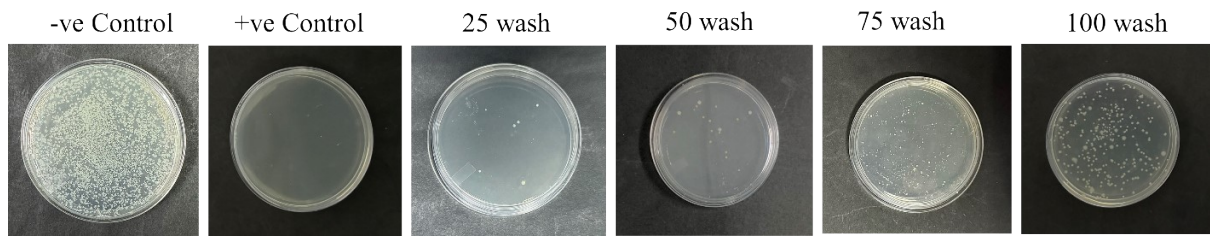

**Fig. S4:** Antimicrobial efficacy of CoTP35-QA after repeated washing with 50% ethanol against *E coli*.
